# Supplementary material
Source: PubMed Central journal article supplement (PMC3918427)
Supplement: NIHMS551618-supplement-Supporting_Information.pdf [file NIHMS551618-supplement-Supporting_Information.pdf]

## Supporting Information

### Synthetically Programmable DNA Binding Domains in Aggregates of DNA-Functionalized Gold Nanoparticles<sup>†</sup>

Sarah J. Hurst,\* Haley D. Hill,\* Robert J. Macfarlane,\* Jinsong Wu,\*\* Vinayak P. Dravid,\*\* and Chad A. Mirkin\*

**Figure S1**

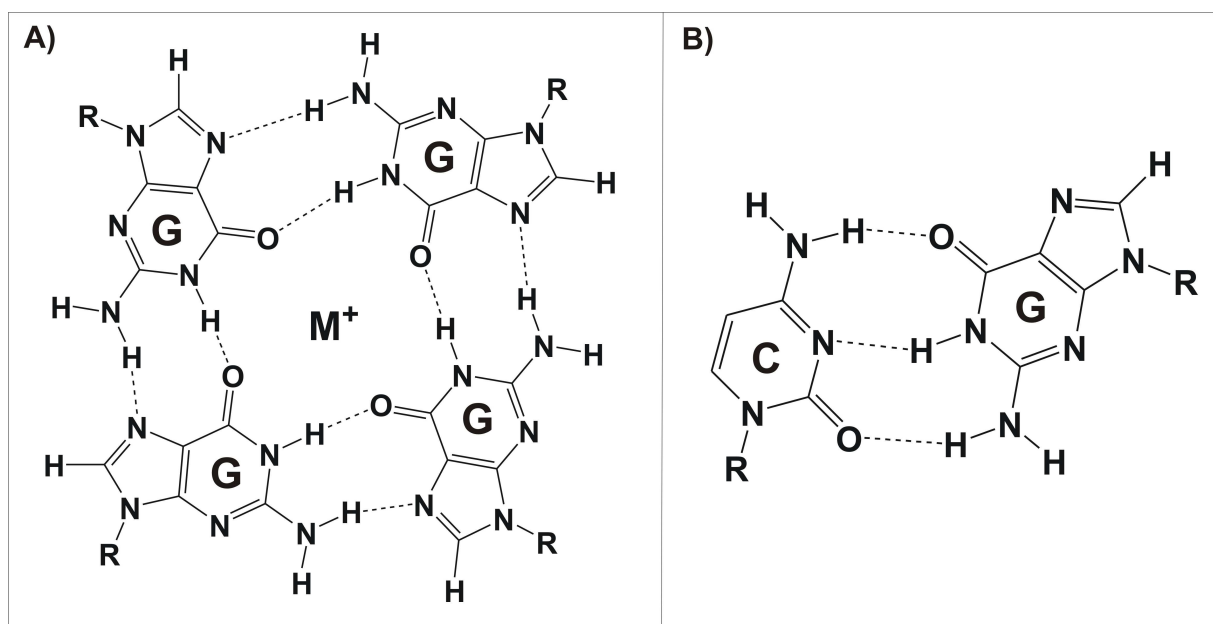

**Figure S1.** General structure of **A)** G-quadruplex and **B)** Watson-Crick binding interactions. Note that R denotes the connectivity of the base to the phosphate-sugar backbone and the dashed lines represent hydrogen bonding interactions. In **A)**,  $M^+$  is a positively charged ion, typically  $K^+$ ,  $Na^+$ , or  $Cs^+$ .

**Figure S2**

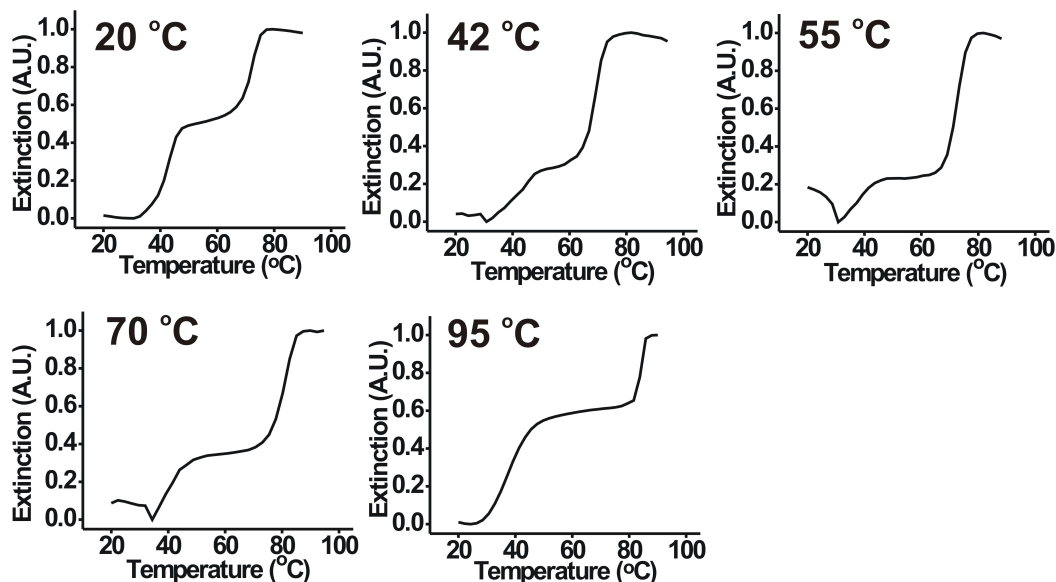

**Figure S2.** Normalized melting transitions (monitored at 260 nm) for aggregates of 60 nm DNA-Au NPs functionalized with A = TCCCC- and B = TGGGG- in 1.0 M NaCl, 10 mM sodium phosphate buffer, 0.01 % SDS annealed at the temperatures listed. These temperatures were chosen because they fall below transition 1 (20 °C), just below the melting temperature of transition 1 (42 °C), between transition 1 and 2 (55 °C), just below the melting temperature of transition 2 (70 °C), and above transition 2 (95 °C). Note that for the samples annealed at 42 °C, 55 °C, and 70 °C transition 1 is comparatively smaller because after annealing all of the particles did not have time to rehybridize. These samples exhibit a small (less than 0.2 A.U. decrease in extinction below ~ 30 °C. These spectral features correspond to the continued hybridization of nanoparticles and the reorganization of the aggregate structure.<sup>[1]</sup>

References:

- [1] R. Jin, G. Wu, C. A. Mirkin, G. C. Schatz, *J. Am. Chem. Soc.* **2003**, *125*, 1643.

Figure S3

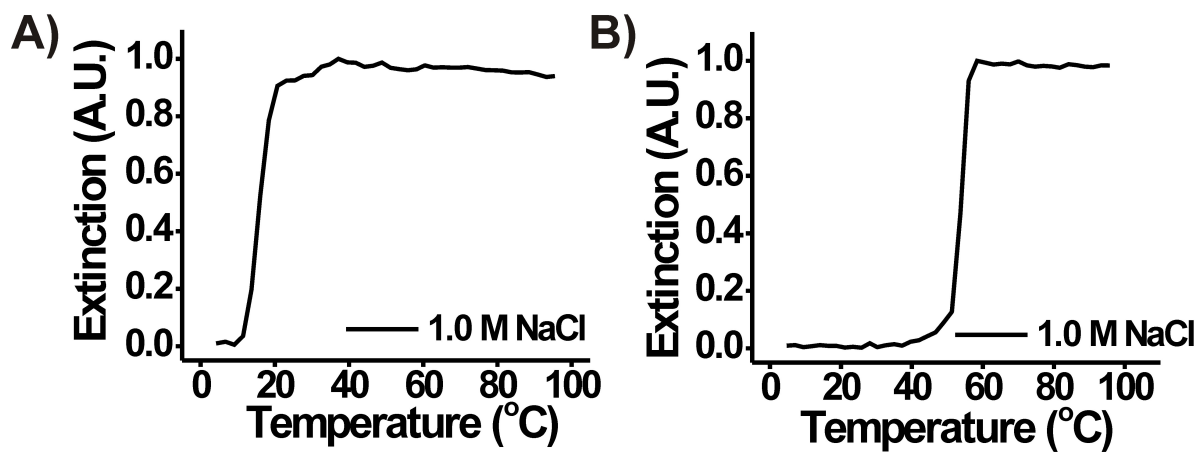

**Figure S3.** Normalized melting transitions (monitored at 260 nm) for aggregates of 60 nm DNA-Au NPs functionalized with **A)** A = B = TCG- and **B)** A = TCGC- and B = TGCG- in 1.0 M NaCl, 10 mM sodium phosphate buffer, 0.01 % SDS.

**Figure S4**

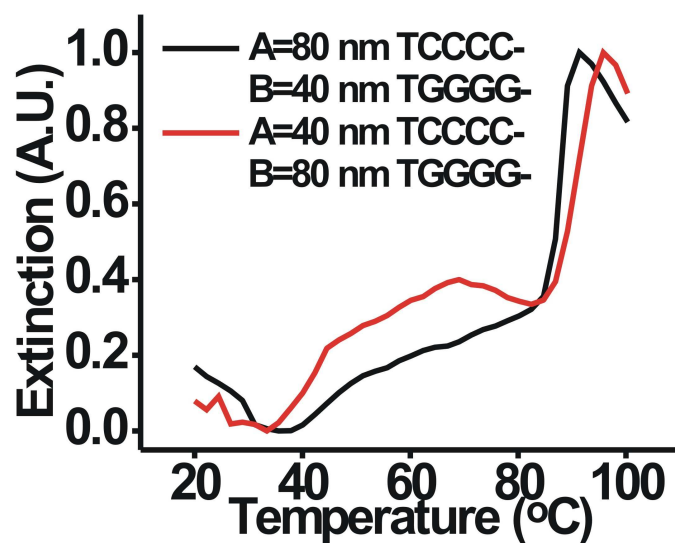

**Figure S4.** Normalized melting transitions (monitored at 560 nm) for aggregates of 40 nm DNA-Au NPs functionalized with TGGGG- and 80 nm DNA-Au NPs functionalized with TCCCC- (black trace) and 40 nm DNA-Au NPs functionalized with TCCCC- and 80 nm DNA-Au NPs functionalized with TGGGG- (red trace) in 0.4 M LiCl, 10 mM Li phosphate, 0.01 % LDS, 0.02 M KCl.

**Figure S5**

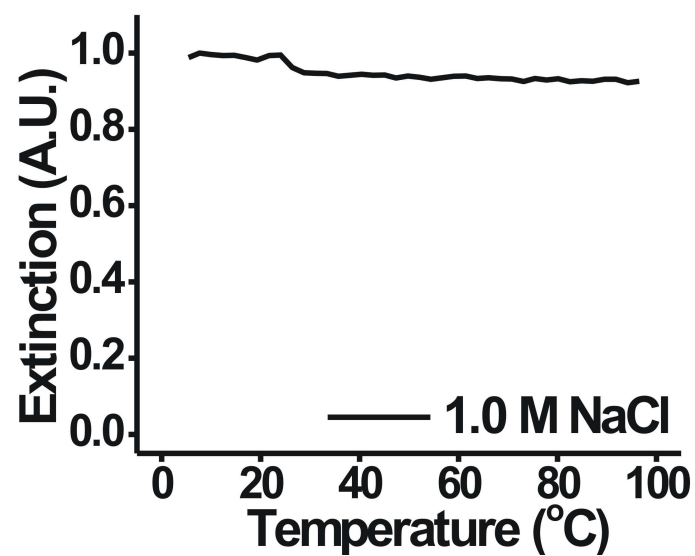

**Figure S5.** Normalized temperature profile (monitored at 260 nm) for 60 nm DNA-Au NPs functionalized with a control poly-T DNA sequence in 1.0 M NaCl, 10 mM sodium phosphate buffer, 0.01 % SDS.

**Table S1.** List of DNA sequences.

| Name         | Oligonucleotide Sequence                                                         |
|--------------|----------------------------------------------------------------------------------|
| <b>TCG-</b>  | 5' – TCG TTT TTT TTT TTT TTT TTT TTT – (CH <sub>2</sub> ) <sub>3</sub> – SH – 3' |
| <b>TCGC-</b> | 5' – TCG CTT TTT TTT TTT TTT TTT TTT – (CH <sub>2</sub> ) <sub>3</sub> – SH – 3' |
| <b>TGCG-</b> | 5' – TGC GTT TTT TTT TTT TTT TTT TTT – (CH <sub>2</sub> ) <sub>3</sub> – SH – 3' |
